# Supplementary material
Source: ML conference proceedings conference paper supplement (https://proceedings.neurips.cc/paper_files/paper/2014/hash/e077e1a544eec4f0307cf5c3c721d944-Abstract.html)
Supplement: Supplementary file [file e077e1a544eec4f0307cf5c3c721d944-Supplemental.zip]

# 1 Proof of Theorem 1

**Definition 1.1.** (Delyon 1996)

Recall our update

$$\mathbf{m}_n - \mathbf{m}_{n-1} = \gamma_n h(\mathbf{m}_n) - \gamma_n \eta_n$$

Let  $\gamma_n$  be a sequence with  $\sum_{i=0}^{\infty} \gamma_i = \infty$  and  $\sum_{i=0}^{\infty} \gamma_i^2 < \infty$ . Let  $\eta_n$  be a perturbation,  $\eta_n = e_n + r_n$ . A stochastic algorithm is *A-stable* if  $\mathbf{m}_n \in K_0$  infinitely often, where  $K_0$  is a compact subset of  $\mathbb{R}^n$  and the series  $\sum \gamma_n e_n$  or  $\sum \gamma_n e_n \mathbb{1}_{V(\mathbf{m}_n) \leq M}$  converges for all  $M$  and  $r_n \rightarrow 0$ .

For technical reasons, we project our weights down to a reasonable compact set where we know the true parameters lie if they ever become unreasonably large. We note that this set can be made arbitrarily large, and for a sufficiently small initial step size we have found this projection does not need to be done in practice. This ensures that the sequence returns infinitely often to a compact set. We note that biological neurons also have physical limitations on their selectivity, which act as effective projections.

**Theorem 1.2.** (Delyon 1996) *The vector field  $h$  is defined on an open set  $\mathcal{O} \subset \mathbb{R}$ . There exists a nonnegative  $C_1$  Lyapunov function  $V$  and a finite set  $\mathcal{K} \subset \mathcal{O}$  s.t.*

- 1)  $V(x)$  tends to  $+\infty$  if  $x \rightarrow \partial\mathcal{O}$  or  $|x| \rightarrow \infty$
- 2)  $h$  is continuous and  $\langle \nabla V(x), h(x) \rangle < 0$  if  $x \notin \mathcal{K}$
- 3) *Conditions for Projection: Let  $\pi(x)$  be a continuous projection onto a compact set  $\mathcal{Q} \subset \mathcal{O}$  s.t.  $\pi(x) = x$  for  $x \in \mathcal{Q}$ , and  $\langle \nabla V(x), \pi(x) - x \rangle < -\delta |\pi(x) - x|$  for some  $x$  in  $\mathcal{O} \setminus \mathcal{Q}$*

Let  $\mathbf{m}_n = \mathbf{m}_{n-1} + \gamma_n h(\mathbf{m}_{n-1}) + \gamma_n \eta_n$ . We further require that the stochastic algorithm is *A-stable*. Then,  $d(\mathbf{m}_n, \mathcal{K})$  converges to 0.

**Theorem 1.3.** *For the full rank case, the projected update converges w.p. 1 to the zeros of  $\nabla \Phi$*

*Proof.* Let  $\mathcal{O}$  be an open neighborhood of  $B$ . We replace our update with its projected version

$$\mathbf{m} = \pi(\gamma_n \phi(c^2, c^3, \theta_{n-1}) \mathbf{d}^1) \quad (1)$$

This projection gives us the first part of the A-stability immediately. Furthermore, the bounded variance of each  $P_k$  and the boundedness of  $\mathbf{m}$  means each  $c$  has bounded variance, so the martingale increment has bounded variance. This, plus the requirement that  $\sum \gamma_i^2 < \infty$  means the martingale is bounded in  $L_2$  so it converges. This gives us the A-stability of the sequence.

Let  $V = -R$  then conditions 1) and 2) of Delyon are clearly satisfied. The optional projection requirement is satisfied by noting that for some  $C$

$$\frac{1}{C} \mathbf{m}^T M \mathbf{m} < \|\mathbf{m}\|^2 < C \mathbf{m}^T M \mathbf{m}$$

and for large enough  $\mathbf{m}$

$$\begin{aligned} \langle \nabla \Phi, \pi(\mathbf{m}) - \mathbf{m} \rangle &< C \|\mathbf{m}\|^4) \\ \text{and } \|\pi(\mathbf{m}) - \mathbf{m}\| &= C'(O(\|\mathbf{m}\|)) \end{aligned}$$

where  $C' = \frac{r}{\mathbf{m}^T \mathbf{m}} - 1$  so for sufficiently large  $r$  the optional projection requirement is satisfied. Therefore the stochastic algorithm converges with probability 1 to the zeros of  $\nabla R$ .  $\square$
